# Supplementary material for: A self-amplified ROS-responsive chemodrug–inhibitor conjugate for multi-drug resistance tumor therapy
Source: Royal Society of Chemistry journal article supplement (doi:10.1039/d1bm01605a), 2022-01-01
Supplement: d1bm01605a1.pdf [file d1bm01605a1.pdf]

## Supporting Information

### **Self-amplified ROS-responsive chemodrug-inhibitor conjugate for multi-drug resistance tumor therapy**

Tingting Sun,<sup>a</sup> Jie Xu,<sup>a</sup> Tianbao Chen,<sup>a</sup> Chunlai Tu,<sup>a</sup> Lijuan Zhu\*<sup>b</sup> and Deyue Yan<sup>a, b</sup>

*a. School of Chemistry and Chemical Engineering, Frontiers Science Center for Transformative Molecules, Shanghai Jiao Tong University, 800 Dongchuan Road, Shanghai, 200240, China.*

*b. Institute of Molecular Medicine, Renji Hospital, School of Medicine, Shanghai Jiao Tong University, 160 Pujian Road, Shanghai, 200217, China*

*E-mail: [lijuanzhu@sjtu.edu.cn](mailto:lijuanzhu@sjtu.edu.cn)*

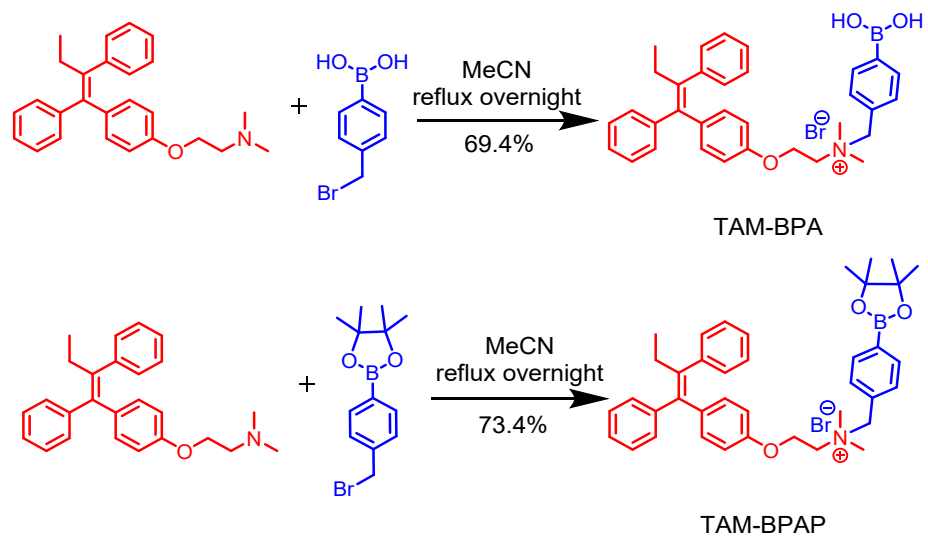

**Fig. S1** Synthesis of the prodrugs: TAM-BPA and TAM-BPAP.

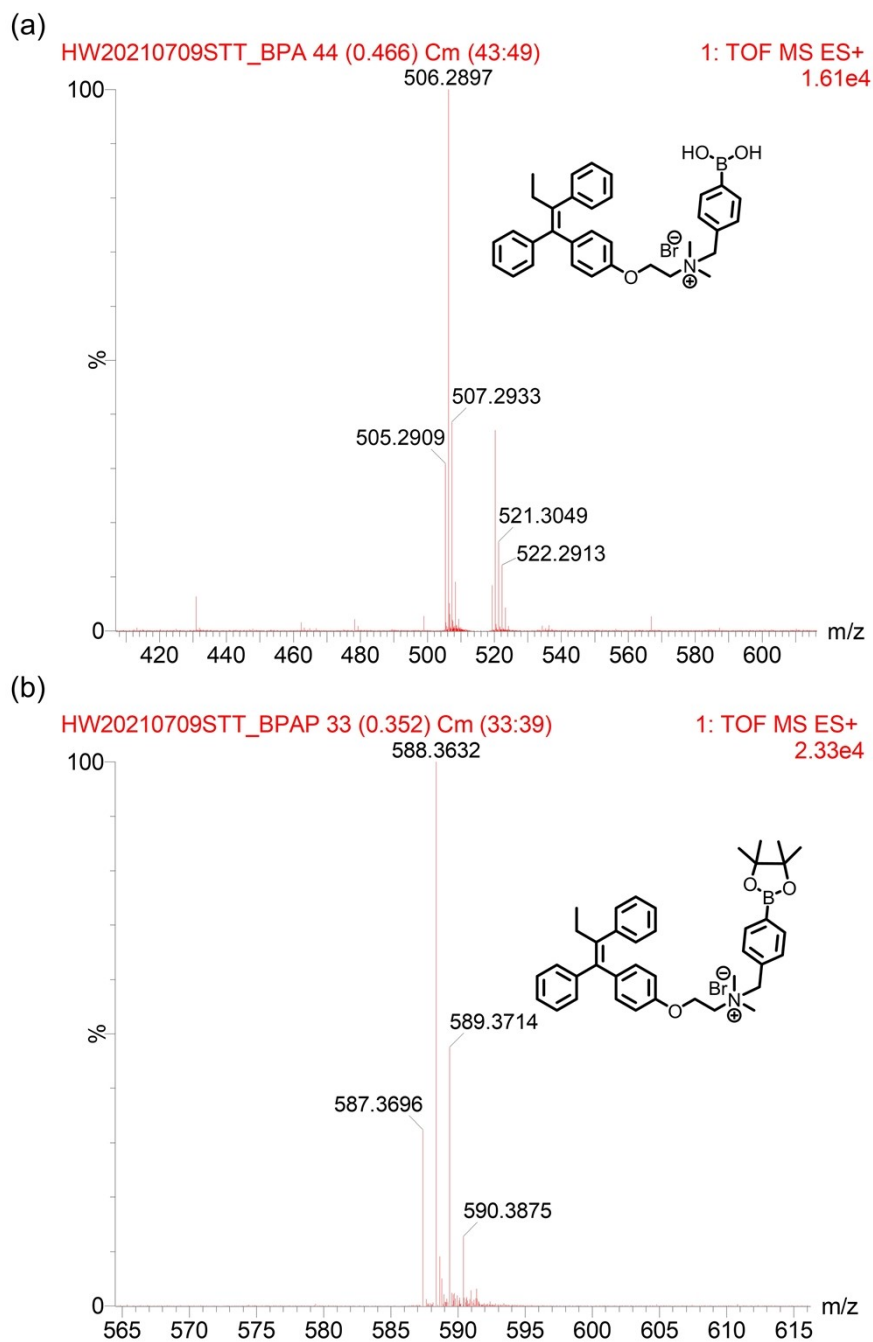

**Fig. S2** (a) HRMS spectrum of TAM-BPA (calculated for  $C_{33}H_{36}BNO_3$ ,  $[M + H]^+$   $m/z$  506.2861, found 506.2897). (b) HRMS spectrum of TAM-BPAP (calculated for  $C_{39}H_{46}BNO_3$ ,  $[M + H]^+$   $m/z$  588.1929, found 588.3632).

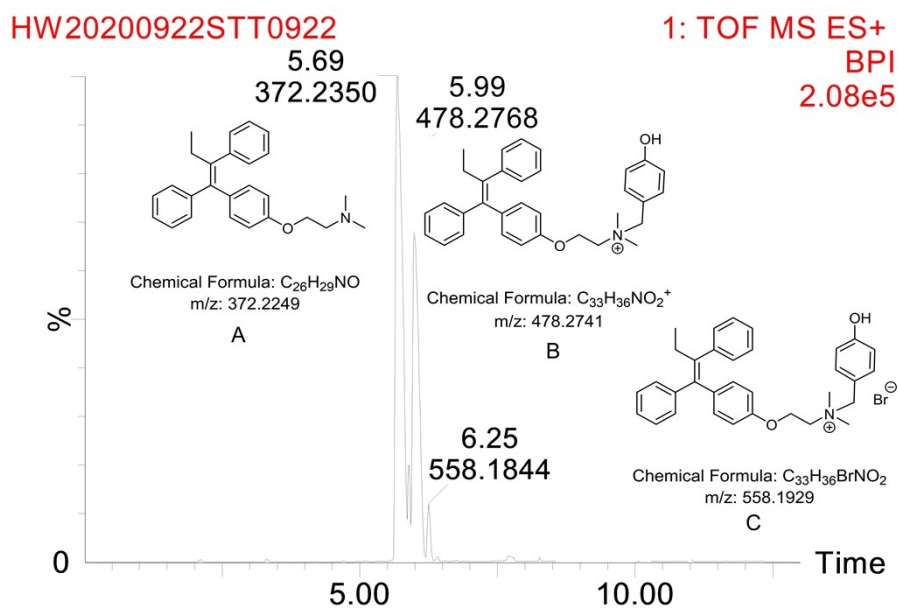

**Fig. S3** LC-MS chromatogram spectrum of TAM-BPAP treated by 100  $\mu$ M  $H_2O_2$  in methanol solution in 37°C for 12 h and its presumed intermediates.

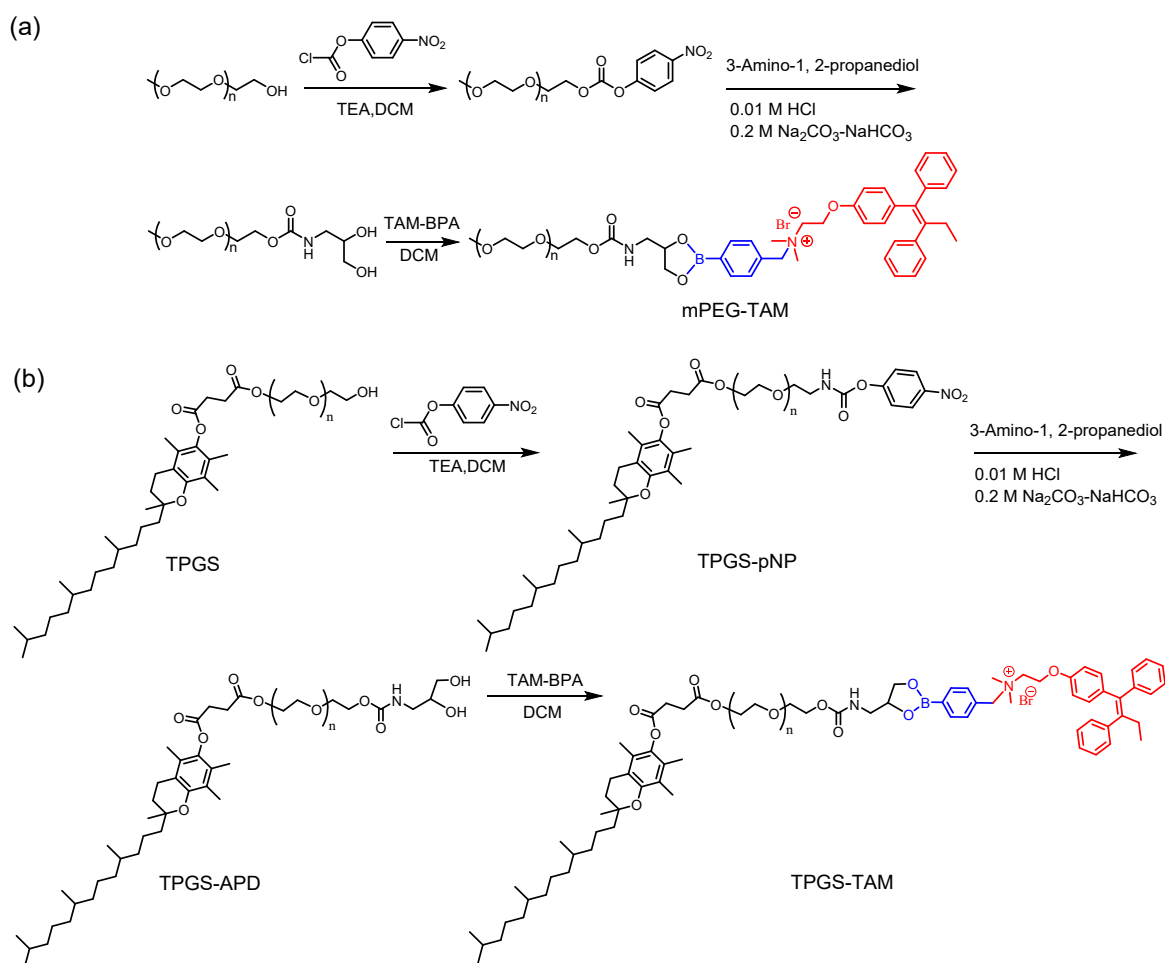

**Fig. S4** The synthetic route of mPEG-TAM and TPGS-TAM conjugate.

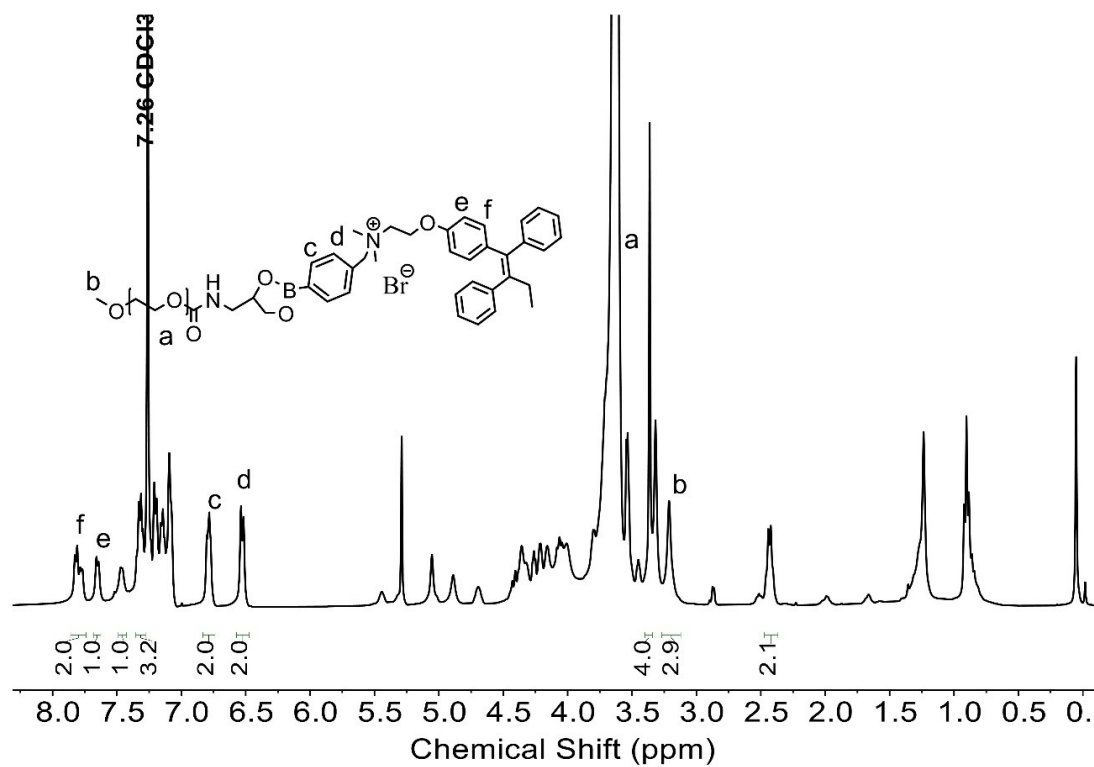

**Fig. S5**  $^1\text{H}$  NMR spectrum of mPEG-TAM in  $\text{CDCl}_3$ .

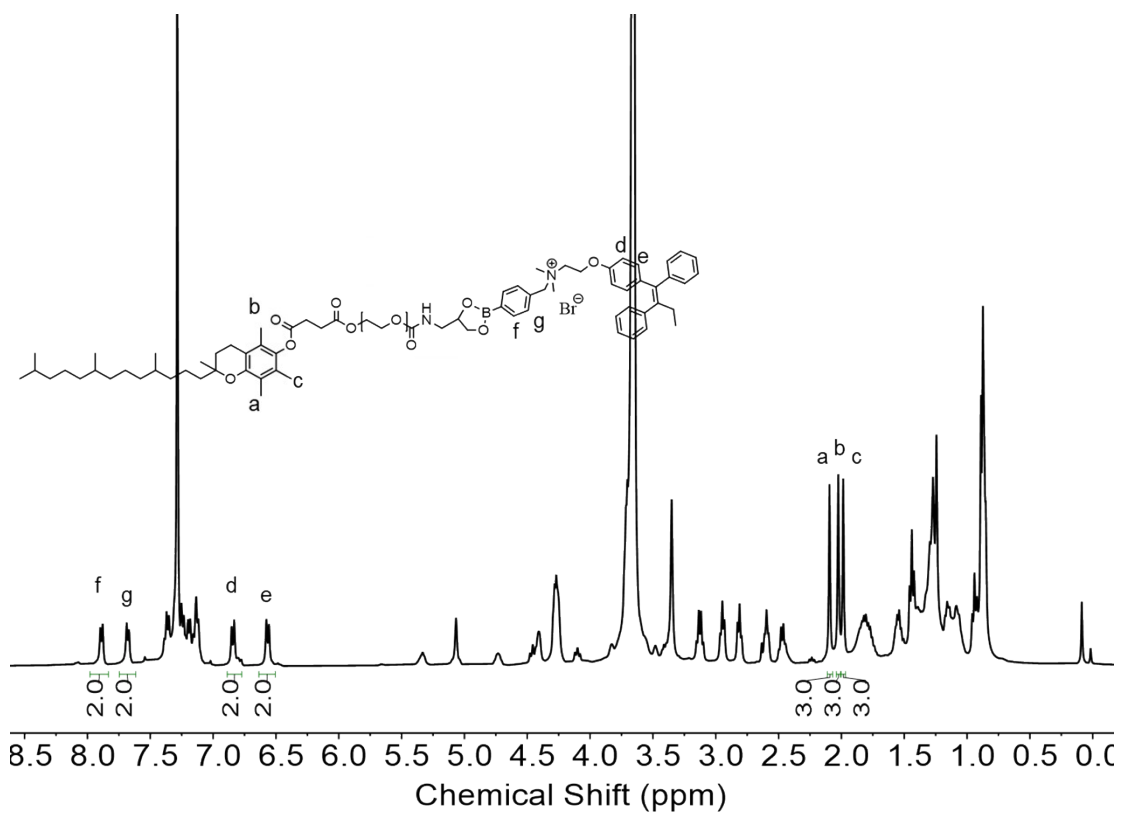

**Fig. S6**  $^1\text{H}$  NMR spectrum of TPGS-TAM in  $\text{CDCl}_3$ .

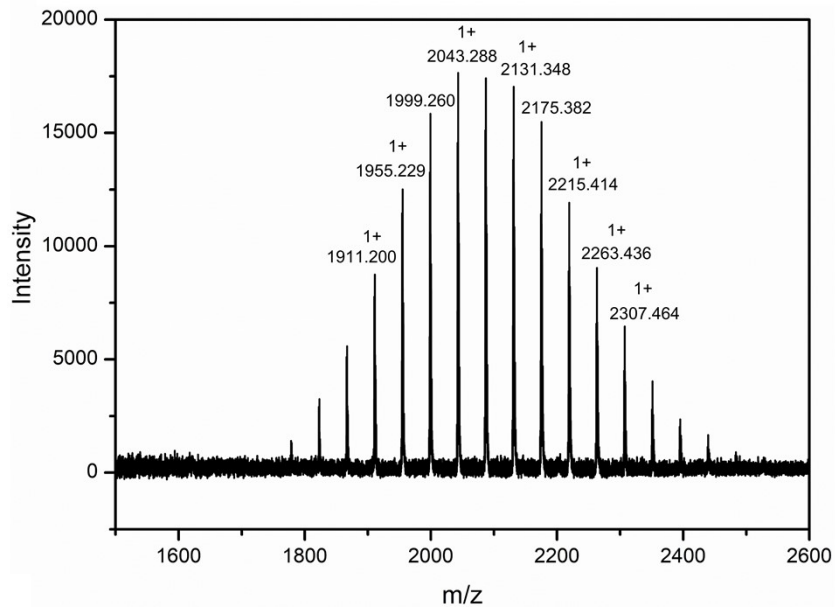

**Fig. S7** MALDI-TOF spectrum of TPGS-TAM, the instrument was run in a positive ion reflection mode using a-cyano-p-hydroxycinnamic acid (CHCA) as a matrix.

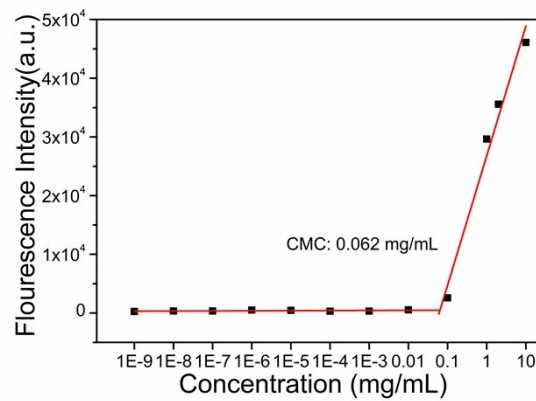

**Fig. S8** The CMC values of TPGS-TAM determined by employing Nile red as a fluorescent probe.

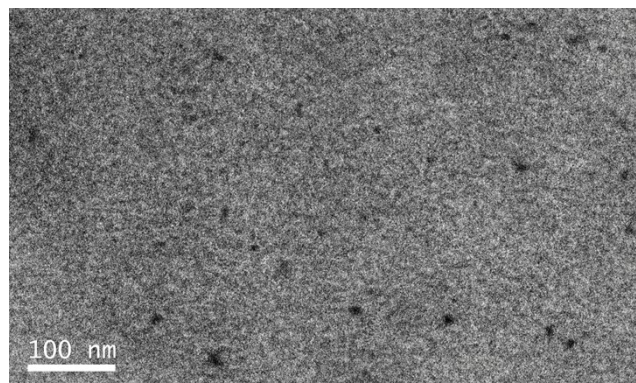

**Fig. S9** TEM image of TPGS-TAM NPs treated with 100  $\mu\text{M}$   $\text{H}_2\text{O}_2$

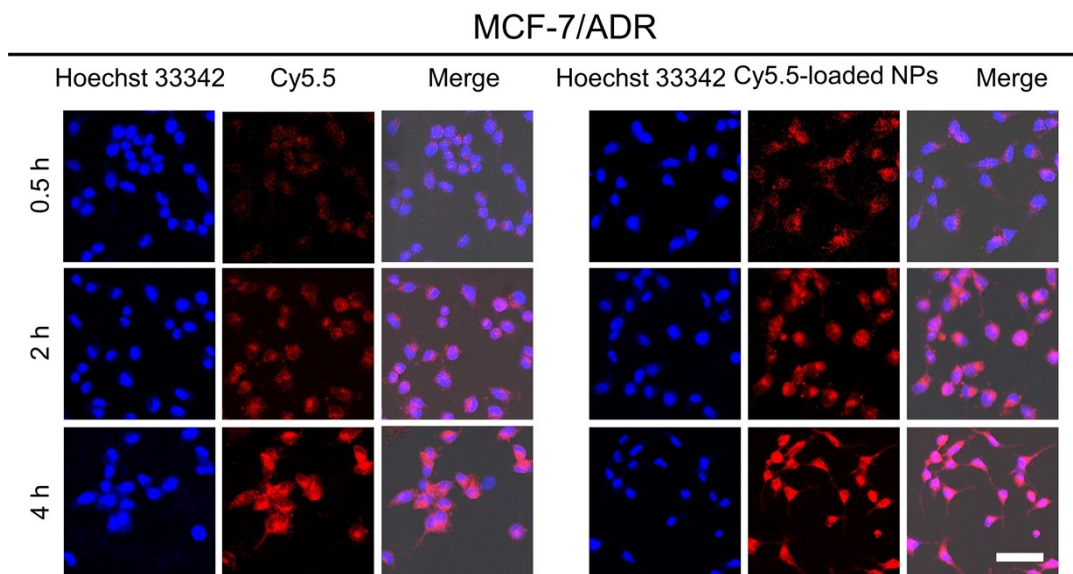

**Fig. S10** CLSM images of MCF-7/ADR cells incubated with Cy5.5-loaded TPGS-TAM NPs for 0.5 h, 2 h, and 4 h respectively with a Cy5.5 concentration of 500 nM, the scale is 50  $\mu$ m.

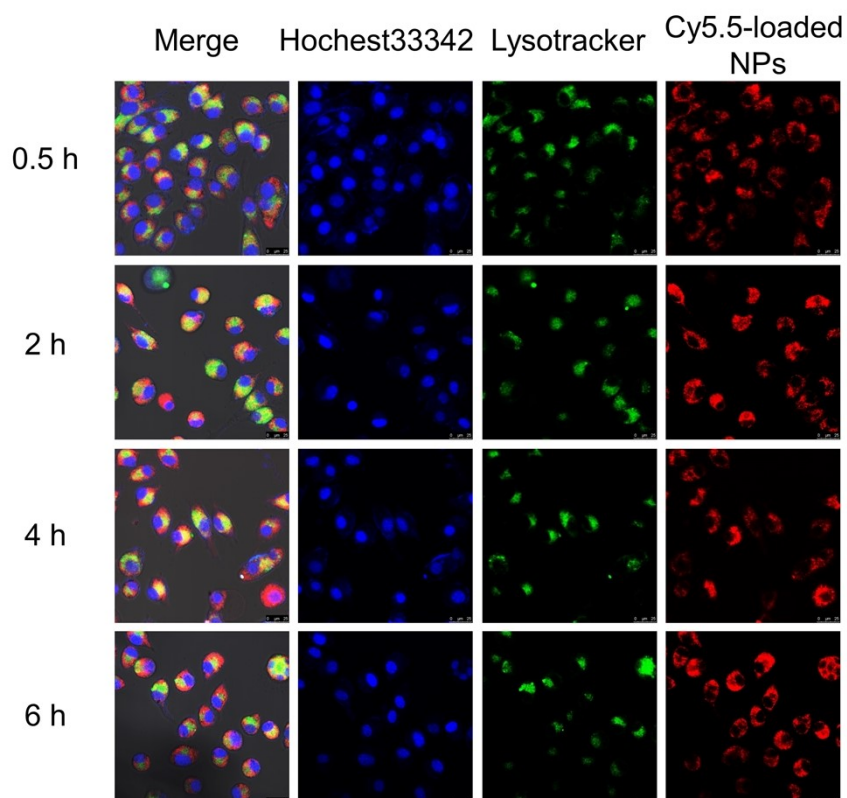

**Fig. S11** CLSM images of MCF-7/ADR cells treated with Cy5.5-loaded NPs for 0.5 h, 2 h, 4 h and 6 h at 37  $^{\circ}$ C. The cell nuclei were stained with Hoechst 33342 and endo lysosomes were stained with Lysotracker Green.

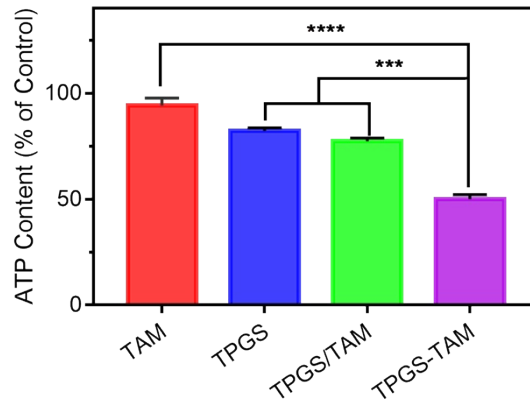

**Fig. S12** Intracellular ATP level after treated with TAM, TPGS, TPGS/TAM and TPGS-TAM for 6 h in MCF-7/ADR cells. Significance is defined as \*\*\* $p < 0.001$ , \*\*\*\* $p < 0.0001$ .

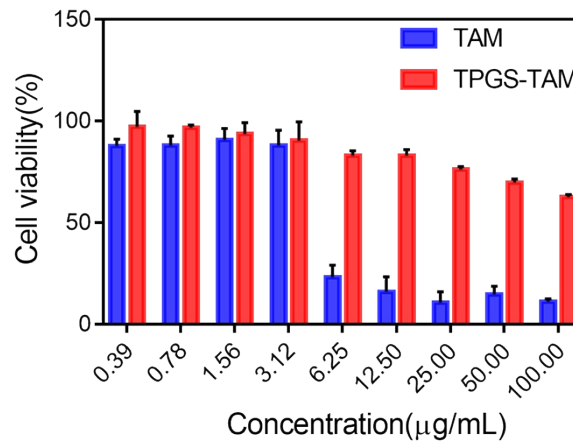

**Fig. S13** Cell cytotoxicity of TPGS-TAM NPs to L929 evaluated by MTT assays with various TAM concentrations from 0.39 µg/mL to 100 µg/mL, the same amount of TAM was used as a control.

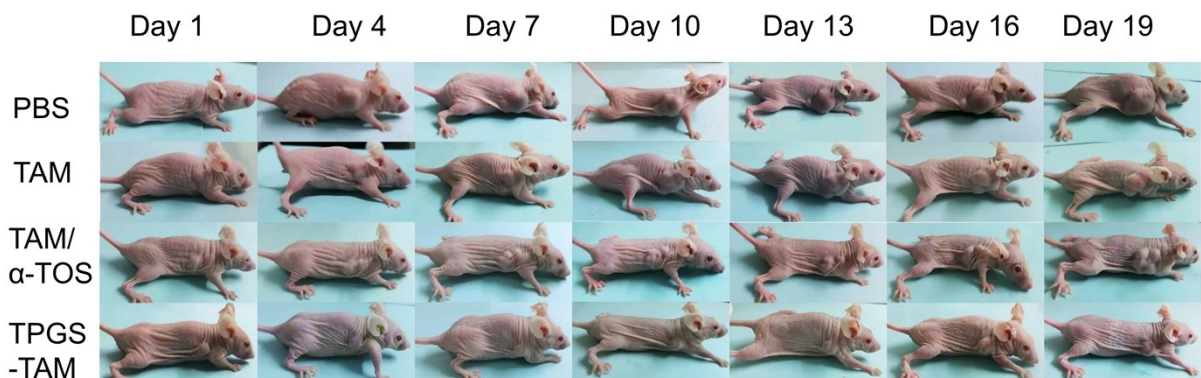

**Fig. S14** Photographs of MCF-7/ADR tumor bearing mice after i.v. administration of different drugs from day1 to day 19.



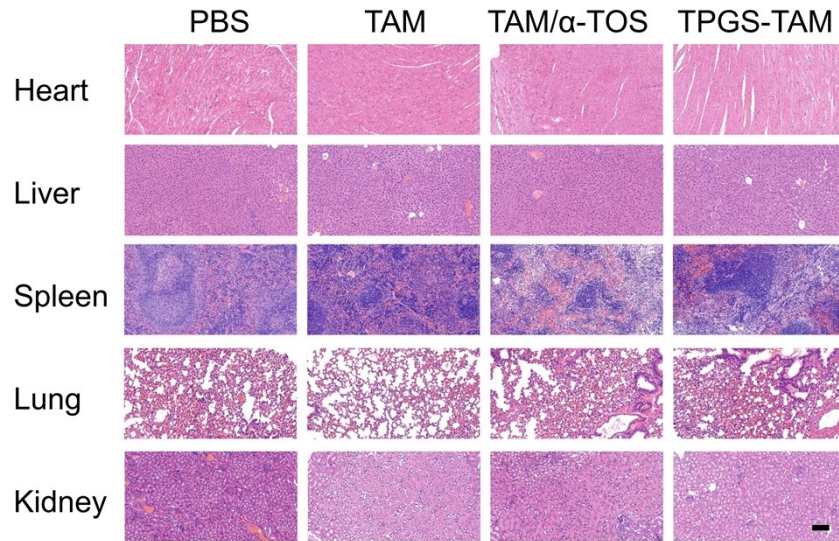

**Fig. S15** H&E staining images of organs excised from MCF-7/ADR xenograft tumor bearing mice after treatment for 18 days (scale bar: 100  $\mu$ m).
